# Supplementary material for: Development of non-viral vectors for neuronal-targeted delivery of CRISPR-Cas9 RNA-proteins as a therapeutic strategy for neurological disorders
Source: Royal Society of Chemistry journal article supplement (doi:10.1039/d2bm00368f), 2022-01-01
Supplement: d2bm00368f1.pdf [file d2bm00368f1.pdf]

## Supplementary Data

# Development of non-viral vectors for neuronal-targeted delivery of CRISPR-Cas9 RNA-proteins as a therapeutic strategy for neurological disorders

Karim E. Shalaby<sup>1,2</sup>, Mustapha Aouida<sup>1,\*</sup>, Vijay Gupta<sup>2</sup>, Houari Abdesslem<sup>2</sup>, Omar M. A. El-Agnaf<sup>1,2,\*</sup>

<sup>1</sup>: Biological and Biomedical Sciences Division, College of Health & Life Sciences, Hamad Bin Khalifa University, Doha, Qatar

<sup>2</sup>: Neurological Disorders Research Center, Qatar Biomedical Research Institute (QBRI), Hamad Bin Khalifa University (HBKU), Qatar Foundation, Doha, Qatar

\* MA: [maouida@hbku.edu.qa](mailto:maouida@hbku.edu.qa); OE: [oelagnaf@hbku.edu.qa](mailto:oelagnaf@hbku.edu.qa)

|                                             |                                                                                                            |
|---------------------------------------------|------------------------------------------------------------------------------------------------------------|
| <b>Supplementary Fig. S1</b>                | Cytotoxicity tests for cell-penetrating peptides using MTT assay                                           |
| <b>Supplementary Fig. S2</b>                | Cellular Reporter Assay for poly-arginine peptides                                                         |
| <b>Supplementary Fig. S3</b>                | Comparing Linear 9r, Cyclic 9r and PepFect14                                                               |
| <b>Supplementary Fig. S4</b>                | Neuronal cell targeting                                                                                    |
| <b>Supplementary Fig. S5</b>                | C2-PF14 delivers RNP complexes to neuronal SH-SY5Y cells and maintains Cas9/gRNA co-localization           |
| <b>Supplementary Tables</b>                 | Table 1; 2; 3: Peptides, Primers, gRNAs and oligonucleotides used in this study                            |
| <b>Additional Supplementary information</b> | DNA sequences and maps of plasmids used in this study:<br>pMRS_Cas9 and pRG2S_Cas9 reporter, DNA sequences |

**Supplementary Figure S1. Cytotoxicity tests for cell-penetrating peptides using MTT assay.** HEK293 cells were treated with different amounts of linear (a) or cyclic (b) poly-arginine peptides, or PepFect14 peptide (c). After 24 hours, viability was measured using MTT assay. Values are expressed as a percentage of the untreated control. Error bars are standard error of  $n = 3$ .

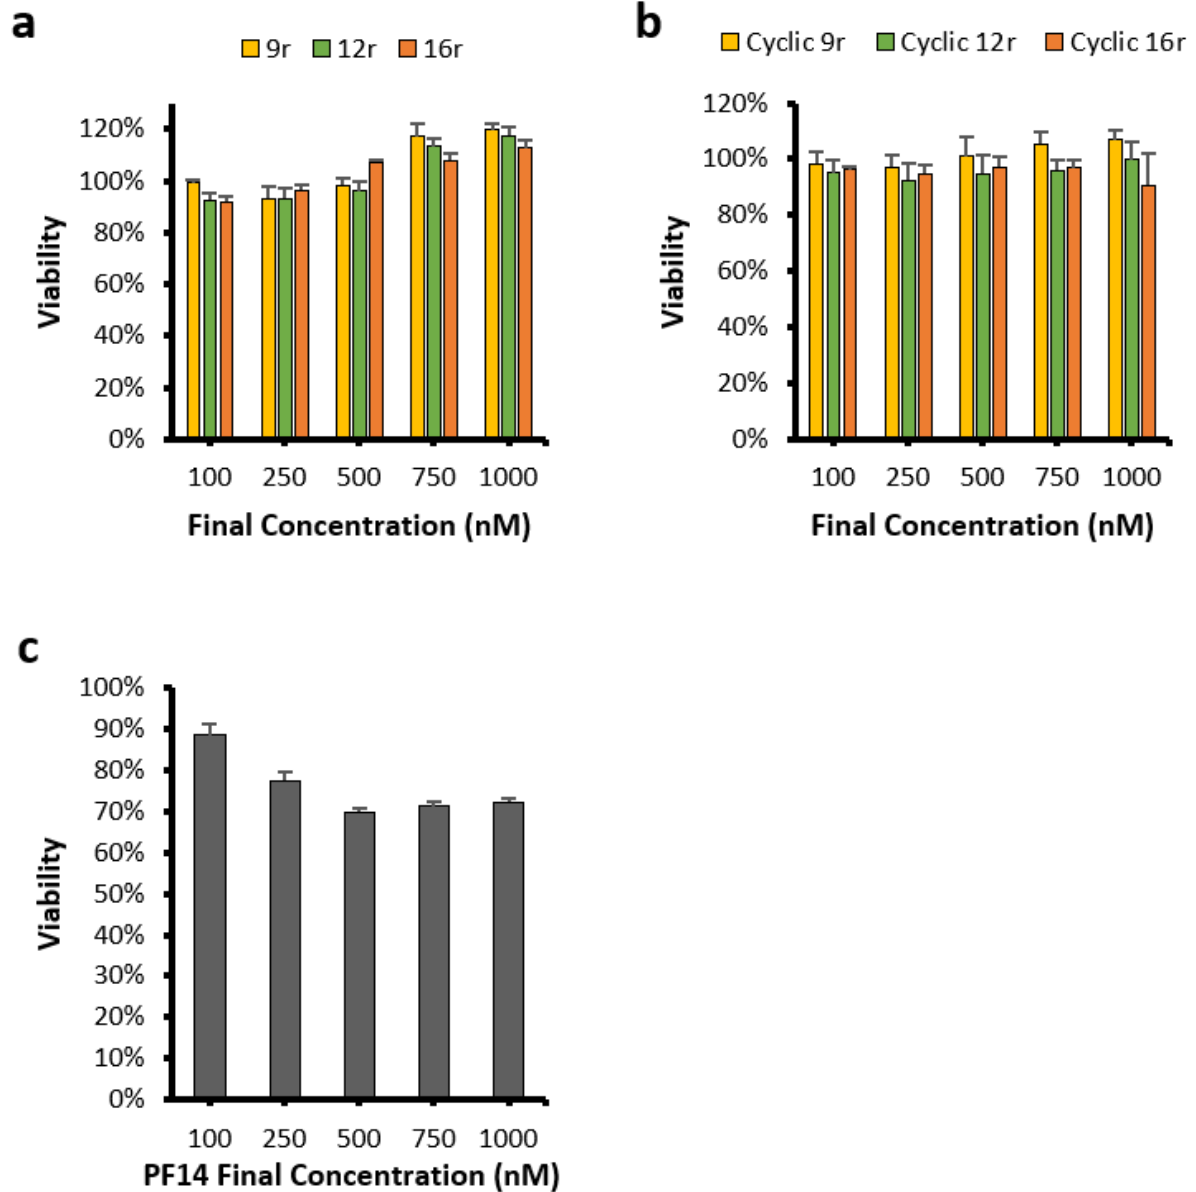

**Supplementary Figure S2. Cellular Reporter Assay for poly-arginine peptides.** To measure nuclease activity, HEK293 cells expressing the pMRS\_Cas9 reporter plasmid were treated with RNP/linear (a) or RNP/cyclic (b) poly-arginine peptide complexes. Cells were treated in a 96-well plate with complexes containing 12 nM RNP using either Lipofectamine CRISPRMAX or peptides at the indicated molar ratios and incubated for 72 hours. RFP and GFP fluorescence were quantified by flowcytometry (i) and the percentage of nuclease active cells  $(RFP^+GFP^+)/ (RFP^+)$  was calculated (ii). The untreated control represents cells not transfected with the reporter plasmid; reporter plasmid was transfected with the reporter plasmid and not treated with any complexes; naked RNP were treated with RNP without peptides. Error bars are standard error ( $n = 3$ ). (c) Representative fluorescent microscopy images and sample gating strategy of  $RFP^+GFP^+$  population in untransfected cells, cells transfected only with pMRS\_Cas9 reporter plasmid, and cells transfected with RNP using Lipofectamine CRISPRMAX.

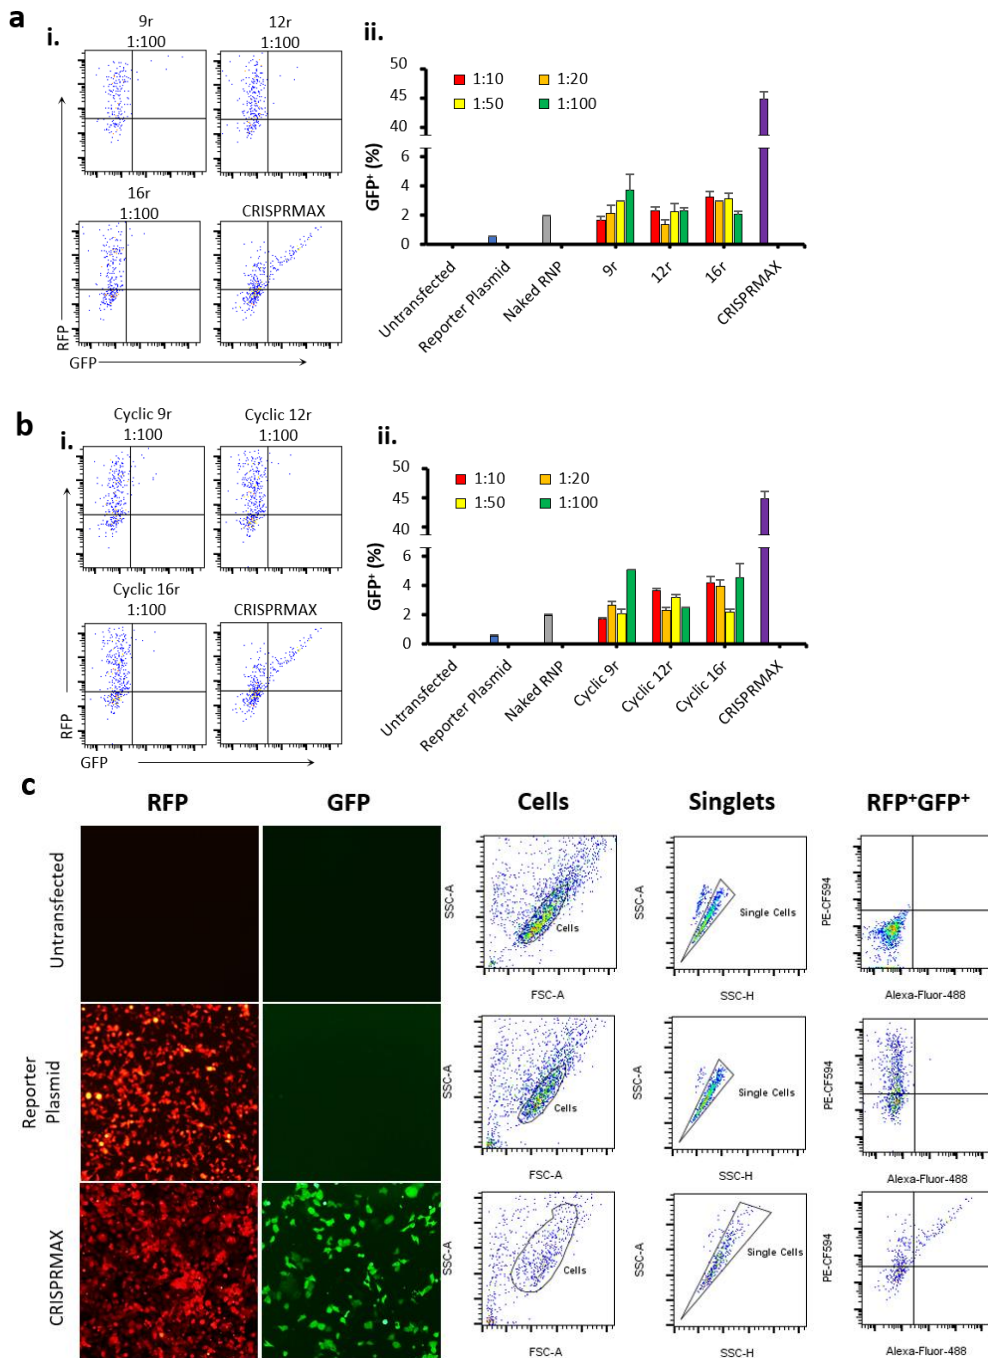

**Supplementary Figure S3. Comparing Linear 9r, Cyclic 9r and PepFect14.** (a-c) Particle size (i and ii) and zeta-potential (iii) analyses for RNP/linear 9r (a), RNP/cyclic 9r (b), and RNP/PepFect14 complexes at the indicated peptide molar ratios. Error bars are standard error of  $n = 3$ . (d) Representative transmission electron microscopy images of RNP complexed with linear 9r, cyclic 9r, or PepFect14 at molar ratio 1:100 (Scale bar = 200 nm). (e) *in-vitro* cleavage assay: pMRS\_Cas9 reporter plasmid containing Cas9 target sequence was incubated with RNA-proteins (RNP) complexed with linear 9r, cyclic 9r or PepFect14 peptides at the indicated molar ratios at 37 °C for 2 hours. DNA was then resolved in a 0.8% agarose gel stained with ethidium bromide at 90 V for 35 minutes and visualized using an ultraviolet transilluminator. (f) Live cell imaging: HEK293 cells were incubated with RNPs, carrying a fluorescently labelled gRNA (ATTO<sup>550</sup>), complexed with peptides at molar ratio 1:100 or Lipofectamine CRISPRMAX and observed at 24 hours post-transfection. Arrows indicate diffused complexes.

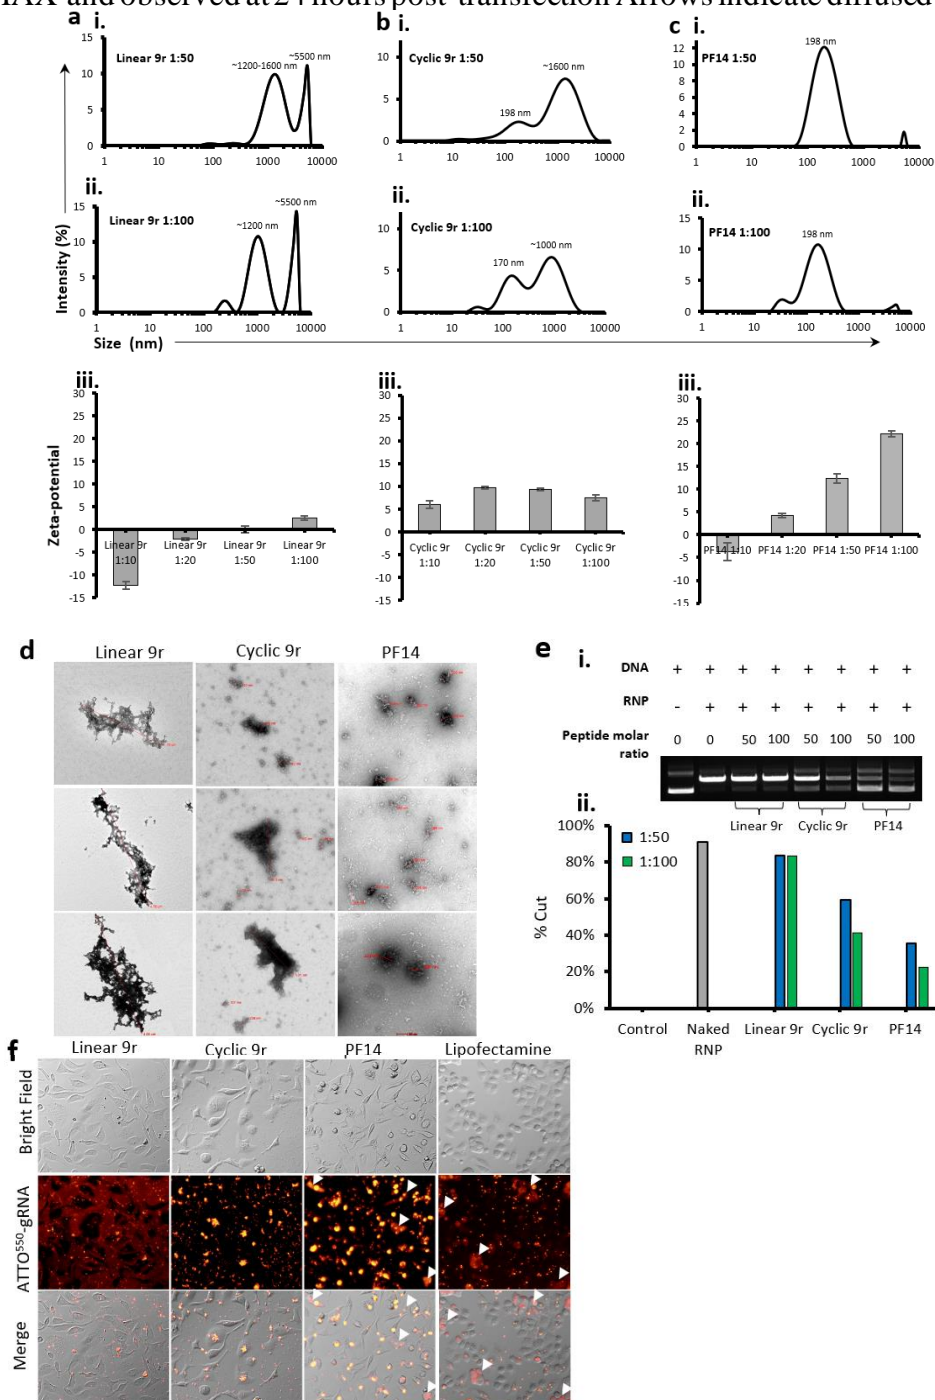

**Supplementary Figure S4. Neuronal cell targeting.** (a) C2-PF14 peptide MTT assay: SH-SY5Y cells were treated with different amounts of C2-PF14 peptide. After 24 hours, viability was measured. Values are expressed as a percentage of the untreated control. (b) and (c) RNP/C2-PF14 MTT Assay: SH-SY5Y cells were treated with RNP/C2-PF14 complexes (b) and RNP/C2-PF14 complexes formulated in PVA-PEG solution (c) at molar ratio 1:50 (RNP:C2PF14), at different final concentrations of RNP as indicated. After 24 hours, viability was measured. Values are expressed as a percentage of the untreated control. Error bars are standard error of  $n = 3$ . (d) Gel-shift assay: ATTO<sup>550</sup> fluorescently labelled gRNA was incubated with C2-PF14 (i) or C2-9r (ii) at the indicated molar ratios and subjected to gel electrophoresis. **iii.** Particle size and zeta potential analyses of RNP/C2-9r and RNP/C2-PF14 complexes. (e) Neuronal SH-SY5Y and non-neuronal S2103 cells were incubated with fluorescently labelled gRNA-ATTO<sup>550</sup>/C2-9r complexes. **ii.** Quantitative representation of the percentage of uptake (cells carrying a signal from fluorescently labelled gRNA-ATTO<sup>550</sup>). **iii.** Quantitative representation of the mean fluorescence intensity ratio (MFIR) of the degree of uptake in cells. Error bars are standard error of  $n = 3$ . (f) Representative transmission electron microscopy images of blank (buffer), naked RNP, C2-PF14, and RNP/C2-PF14 nanocomplexes formed at the indicated molar ratios. (Scale bar = 200 nm).

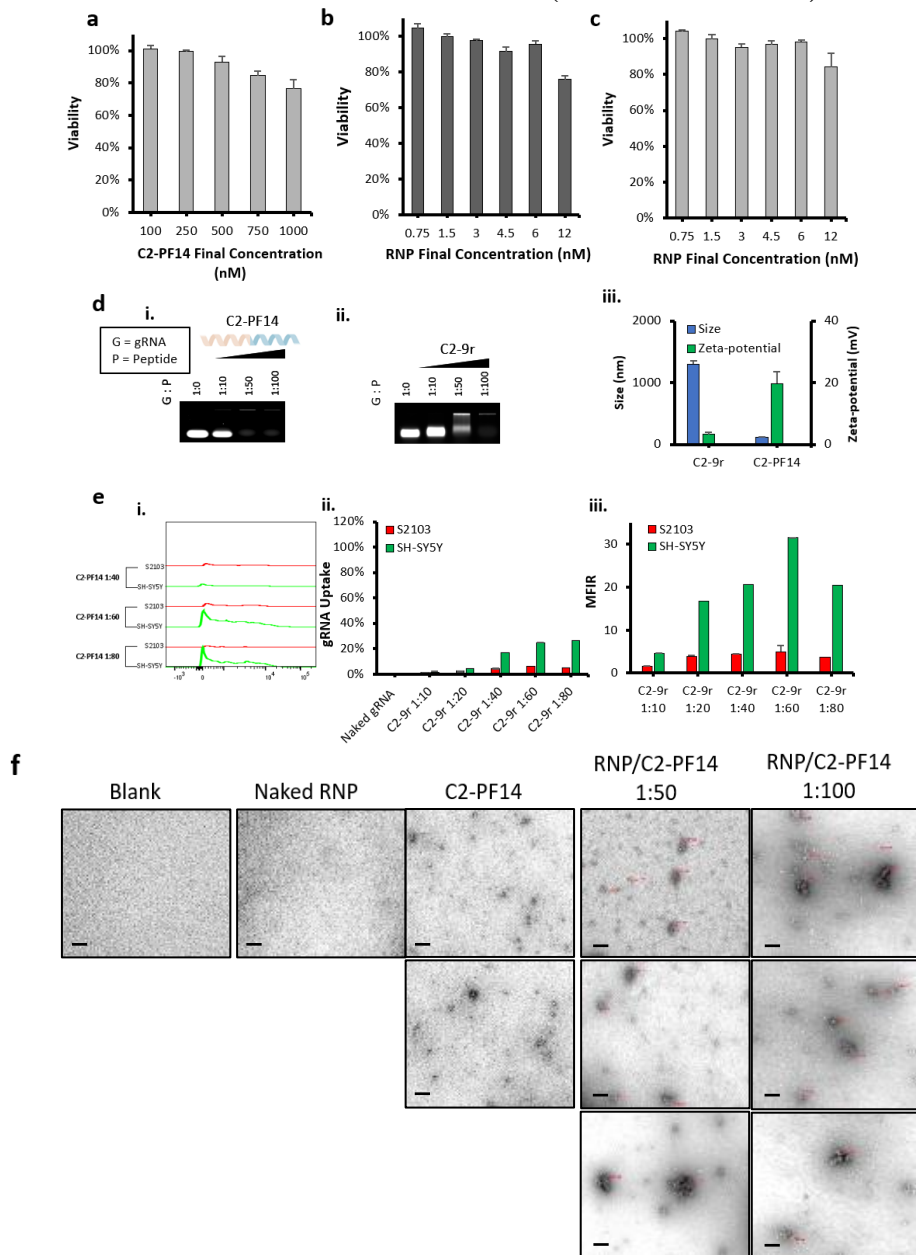

**Supplementary Figure S5. C2-PF14 delivers RNP complexes to neuronal SH-SY5Y cells and maintains Cas9/gRNA co-localization.** SH-SY5Y cells were treated with Cas9/ATTO<sup>550</sup>-gRNA RNP complexes (3 nM RNP) using C2-PF14 (a) or Lipofectamine RNAiMAX (b). Cells were stained with Cas9 specific antibody (Alexa-fluor 488) and fixed using 4% paraformaldehyde at 24, 48, and 72 hours and imaged using a confocal microscope. Images were taken at representative fields with blue DAPI-stained nuclei, and co-localization of Cas9 (green) and ATTO<sup>550</sup>-labelled gRNA (red) appearing yellow.

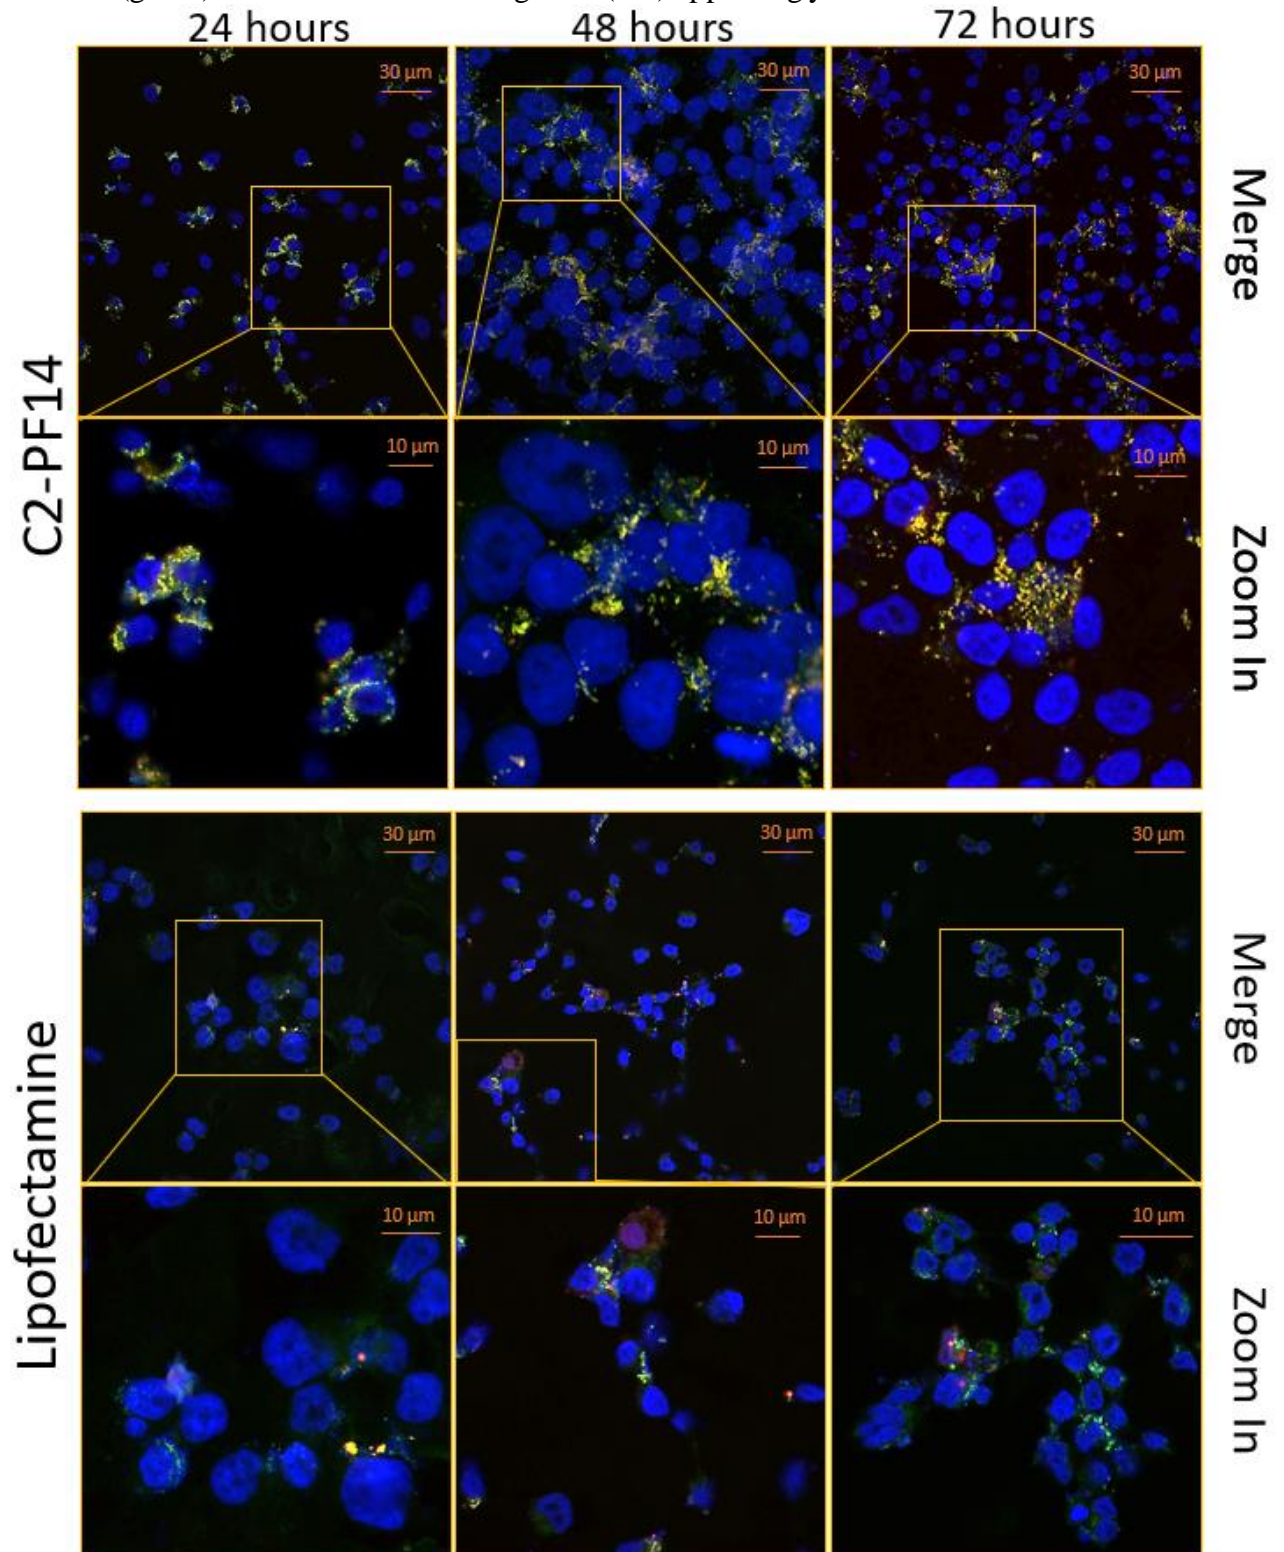

**Tables:****Table 1: Peptides used for complexing and delivering RNA-proteins (RNP):**

| Peptide    | Sequence                                                                 |
|------------|--------------------------------------------------------------------------|
| 6r         | rrrrrr                                                                   |
| 9r         | rrrrrrrrr                                                                |
| 12r        | rrrrrrrrrrr                                                              |
| 16r        | rrrrrrrrrrrrr                                                            |
| 20r        | rrrrrrrrrrrrrrr                                                          |
| Cyclic 9r  | CrrrrrrrrrC                                                              |
| Cyclic 12r | CrrrrrrrrrrrC                                                            |
| Cyclic 16r | CrrrrrrrrrrrrrC                                                          |
| PepFect14  | Stearyl-AGYLLGKLL-Orn-Orn-LAAAAL-Orn-Orn-LL                              |
| RI-C2-9r   | rrrrrrrrr-Sar-Sar-Sar-Sar-arkGrsntfidc                                   |
| RI-C2-PF14 | Stearyl-AGYLLGKLL-Orn-Orn-LAAAAL-Orn-Orn-LL-Sar-Sar-Sar-Sar-arkGrsntfidc |

**Table 2: Primers used for cloning, sequencing and amplification of gRNAs:**

| Primer            | Sequence                             | Experiment                                            |
|-------------------|--------------------------------------|-------------------------------------------------------|
| pRG2S_Forward     | 5'-CTGCCCCGGCGCCTACAAGAC-3'          | Cloning Cas9 target sequence                          |
| pRG2S_Reverse     | 5'-CGTAGCCTTCGGGCATGGCG-3'           |                                                       |
| SNCA_Forward      | 5'-CACTCATGGCTTTACATTCCTGATCGT-3'    | Amplifying SNCA target sequence for mutation analysis |
| SNCA_Reverse      | 5'-TCAGGTAGCCGTTCCCCACAGTAA-3'       |                                                       |
| M13_Forward (-20) | 5'-GTAAAACGACGGCCAG-3'               | Sanger's sequencing of the edited gene targets        |
| U6-gRNA_Forward   | 5'-GCGGCCGCGAGGGCCTATTT-3'           | Amplifying U6 gRNA expression fragments               |
| U6-gRNA_Reverse   | 5'-GGATCCTAGTACTCGAGAAAAAAGCACC G-3' |                                                       |

**Table 3: Guide RNAs (gRNA) used for targeting reporter and endogenous genes:**

| gRNA              | Sequence                   | Experiment                                               |
|-------------------|----------------------------|----------------------------------------------------------|
| Cas9_Target_gRNA2 | 5'-CTGCTGTGACTGCTTGTAGA-3' | Reporter assay for the detection of CRISPR-Cas9 activity |

|                     |                                                                                                                                                                                                                                                                                                                                                                                                                                                            |                                                          |
|---------------------|------------------------------------------------------------------------------------------------------------------------------------------------------------------------------------------------------------------------------------------------------------------------------------------------------------------------------------------------------------------------------------------------------------------------------------------------------------|----------------------------------------------------------|
| U6-pRG2S-Cas9-gRNA2 | GCGGCCGCGAGGGCCTATTTCCCA<br>TGATTCCCTTCATATTTGCATATACG<br>ATACAAGGCTGTTAGAGAGATAAT<br>TAGAATTAATTTGACTGTAAACAC<br>AAAGATATTAGTACAAAATACGTG<br>ACGTAGAAAGTAATAATTTCTTGG<br>GTAGTTTGCAGTTTTTAAAATTATGT<br>TTTAAAATGGACTATCATATGCTTA<br>CCGTAACTTGAAAGTATTTGATTT<br>CTTGGGTTTATATATCTTGTGGAAA<br>GGACCCACCTTGTTGGCTGCTGTGA<br>CTGCTTGTAGAGTTTTAGAGCTAGA<br>AATAGCAAGTTAAAATAAGGCTAG<br>TCCGTTATCAACTTGAAAAAGTGG<br>CACCGAGTCGGTGCTTTTTTTCTCG<br>AGTACTAGGATCC | Reporter assay for the detection of CRISPR-Cas9 activity |
| gSNCA3 sgRNA        | 5'- AAAGAGCAAGTGACAAATGT-3'                                                                                                                                                                                                                                                                                                                                                                                                                                | Inducing mutation in and knocking out <i>SNCA</i> gene   |

**DNA sequences and maps of plasmids used in this study:**

**Cas9 Target Sequence: (yellow, cloned between BamHI and BstXI)**

5'-

atggccaagaagcccgtgcagctgccggcgctacaagaccgacatcaagctggacatcacctcccacaacgaggactacacat  
cgtggaacagtagcagcgcgccgagggccgccactccaccggcgccgaattc **GCGTCCGCGCCATGGCCATCT**  
**ACAAGCAGTCACAGCA**g-3'

**pMRS\_Cas9 sequence and map:**

tagtattaatagtaataaattacggggtcattagttcatagccatataatggagtccgcgttacataacttacggtaaatggcccgcctg  
gctgaccgcccacgacccccgccattgacgtcaataatgacgtatgtcccataagtaacgccaatagggactttccattgacgtcaat  
gggtggagtatttacggtaactgcccactggcagtagatcaagtgatcatatgccaagtacgccccctattgacgtcaatgacggta  
aatggcccgcctggcattatgcccagtagatgacctatgggactttcctacttggcagtagatctacgtattagtcacgctattaccatg  
gtgatgcggtttggcagtagatcaatgggcgtggatagcggttgactcagggggattccaagtctccaccccattgacgtcaatggg  
agtttgtttggcaccaaaatcaacgggactttccaaaatgtcgtacaactccgccccattgacgcaaatgggggtagggcgtgtacg  
gtgggaggtctatataagcagagctggttttagtaaccgtcagatccgcttgcaccatggcctcctccgaggacgtcacaaggagtt  
catgcctcaaggtgcgatggagggtccgtgaacggccacgagttcagatcaggggcgagggcgaggccgcccctacga  
gggcaccagaccgccaagctgaaggtgaccgaagggcggccccctgcccctcgcctgggacatcctgtcccctcagttccagtagc  
gctccaaggcctacgtgaagcaccgccgacatccccgactacttgaagctgtccttcccaggggcttcaagtgggagcgcgtga  
tgaacttcgaggacggcggcgtggtgaccgtgaccaggactcctcctgcaggacggcagttcattacaaggtgaagctgcgc  
ggcaccacttcccctccgacggcccgtaatgcagaagaagaccatgggctgggaggcctccaccgagcggatgtaccccaggg  
acggcgccctgaagggcgagatcaagatgaggctgaagctgaaggacggcggccactacgacgccgaggtaagaccacctaca  
tggccaagaagcccgtgcagctgccggcgctacaagaccgacatcaagctggacatcacctcccacaacgaggactacacatc  
gtggaacagtagcagcgcgccgagggccgccactccaccggcggcgaattc**GCGTCCGCGCCATGGCCATCT**  
**ACAAGCAGTCACAGCA**ggatccagtgacgaagggcgaggagctgttcaccggggtggtgccatcttggtcagct  
ggacggcgacgtaaacggccacaagttcagcgtgtccggcagggcgagggcgatgccacctacggcaagctgacctgaagt  
catctgaccaccggcaagctgcccgtgccctggcccacctcgtgaccacctgacctacggcgtgacgtgcttcagccgctacc  
cgaccacatgaagcagcagacttctcaagtcgccatgcccgaaggctacgtccaggagcgcaccatcttctcaaggacgacgg  
caactacaagaccgcgccgaggtgaagttcagggcgacacctggtgaaccgatcagctgaagggcctcagcttcaaggag  
gacggcaacatcctggggcacaagctggagtacaactacaacgccacaacgtctatatcatggccgacaagcagaagaacggcat



caaggtgaactcaagatccgccacaacatcaggacggcagcgtgcagctcggcaccactaccagcagaacacccccatcggc  
gacggccccgtgctgctgccc gacaaccactactgagcaccagtcgccctgagc aaagacccaacgagaagcgcgatca  
tggtcctgctggagttcgtgaccgccgccgggatcactctcggcatggacgagctgtacaagcaatgtactaactacgctttgtgaaa  
ctcgtggcgtggtgaaagtaacccggctcctgctagatggcaccctgcatgctcctgctgttggcggccgccctggccccga  
ctcagaccgcgcgggcccacatcgtgaggattttccacaccgccgtgtcccggcccggcctcgggaagccccggttc atctctg  
tcggctacgtggacgacacgcagttcgtgcgcttcgacagc gacgcggagaatccgaggtatgagccgcgggtgcggtggatgga  
gcaggtggagcccgagtattgggagcggaaacacgcagatcgccaaaggcaatgagcagattttccgagtgaacctgaggaccgcg  
ctgcgctactacaaccagagcgcgggcggctctcacacgttccaacggatgtacggctgtgaggtggggtcggactggcgcctcct  
ccgcgggtacgagcagtagc atacgacggctgcgattacatcgccctgaacgaagacctgaaaacgtggacggcggccgacatg  
gcggcgtgatccaaacacaagtgggagcaggctgggtgatgcagagagagaccgggctacctggaggggcaggtgcgtggag  
tggctccgcagatacctgcagctcgggaacgcgacgctccgcgcacagattccccaaaggccatgtgaccgacacagcagac  
ctgaagataaagtcaccctgaggtgctgggcccctgggcttctaccctgctgacatcaccctgacctggcagttgaatggggaggagct  
gaccaggacatggagcttftggagaccaggcctgcaggggatggaacctccagaagtgggcatctgtggtggtgcctcttggga  
aggagcagtaftacacatgccatgtgtaccatcaggggctgctgagccccaccctgagatgggagcctcctccatccactgtctcc  
aacacggtaatcattgctgttctggtgtccttggagctgcaatagtcactggagctgtggtggctttt gtgatgaa gatgagaag gaga  
acacaggtggaaaaggagggtaaagcggccgcgactctagatcataatcagccataccacattgtagaggtttactgttataaaaa  
cctccacacctccccgaaacctgaaacataaaatgaatgcaattgttgttgaacttgtttattgcagcttataatggttacaataaag  
caatagcatcaca aatttcacaataaagcattttttactgcattcagttgtgtgttttccaaactcatcaatgtatctaaaggc gtaaatt  
gtaaagcgttaatattttgttaaaatcgcgttaattttgttaaatcagctcatttttaacc aataggccgaaatcggcaaaatccctataaa  
tcaaaaagaatagaccgagatagggtgaggtgttccagtttggaaacaagagtcactattaaagaacgtggactccaacgtcaaaagg  
gcgaaaaaccgtctatcagggcgatggcccactacgtgaaccatcacccatacaagtttttgggctcaggtgcccgtaaagcacta  
aatcggaaacctaaaggagccccgatttagccttgacggggaaa gccggcgaacgtggc gagaaggaaggaa gaaagc  
gaaaggagcgggcgctaggcgcgtggcaagtgtagcggtcacgctgcgcgtaaccaccacaccgccgcgctaatgcgccgcta  
cagggcgcgtcaggtggcacttttcggggaaatgtgcgcggaacccctattgtttttttaaatacattcaaatatgtatccgctcatg  
agacaataaccctgataatgcttcaataatattgaaaaaggaaagctcagggcggaaa gaaccagctgtggaatgtgtgtagtta  
gggtgtggaaagtc cccaggctcccagcaggcagaagtatgcaagcagatgc atctcaattagtcagcaaccaggtgtgaaagtc  
ccaggctcccagcaggcagaagtatgcaagcagatgc atctcaattagtcagcaaccatagtcccgccctaacctccgccatccc  
cccctaacctccgccagttccgccattctccgcccatggctgactaatttttttattatgcagaggccgaggccgcctcggcctctg  
agctattccagaagtagtgaggaggctttttggaggcctaggcttttgc aaagatc gatcaagagacaggatgaggatcgttccgcatg  
attgaacaagatggattgcacgcaggctccggccgcttgggtggagaggctattcggctatgactgggcacaacagacaatcggct  
gctctgatgccgccgtttccggctgacgcagggggcggccggctttttgtcaagaccgacctgtccgggtgccctgaatgaactg  
caagacgaggcagcgcggctatcgtggctggccacgacgggcgttccttgcgcagctgtgctc gacgttgcactgaagcgggaag  
ggactggctgtattgggcgaaagtccggggcaggatcctgtcatctcaccctgctcctgccgagaaatgatccatcaggtgatg  
caatgcggcggctgatacgtttgatccggctacctgccattc gaccaccaagcgaacatcgc atcgagc gacacgtactcgg  
tggaaagccggcttctgcatcaggatgatctggacgaaagc atcaggggctcgcgccagccgaactgttcgccaggctcaaggcg  
agcatgcccgacggcaggatctcgtcgtgaccatggcgtatgcttgcctgccaatc atggtgaaaatggccgcttttctggatt  
catcactgtggccggctgggtgtggcggaccgctatcaggcatagcgttggctaccgtgatattgtgaagagcttggcggcga  
atgggctgaccgcttctcgtctttacggfatcggcgtccc gattcgcagcgc atcgccttctatcgccttctgacgagttctctgag  
cgggactctggggttc gaaatgaccgaccaagc gacgccaacctgccatcacgagattc gattccaccggccgcttctatgaaag  
gttgggcttcggaatcgtttccgggacgccggctggatgatctccagcgcggg gatctc atgctgga gttctc gccaccctagg  
ggaggctaactgaaacacggaaggagacaataaccggaaggaaaccgcgctatgacggcaataaaaagacagaataaaacgcacg  
gtgtgggtcgtttgtcataaacgcggggctcgtcccagggtggcactctgtc gataccccaccgagaccccattggggccaatac  
gcccgcgttctctctttcccccaccccccaggctcgggtgaaaggcccagggtcgcagccaacgtcggggcggcaggccct  
gccatagctcaggttactatatacttttagattgattttaaactcatttttaattaaaggatctagggtgaagatccttttgaatctca  
tgacaaaatccctaacgtgagtttctgttccactgagcgtcagaccccgtagaaaagatcaaaaggatcttcttgatcctttttctgc  
gcgtaatctgctgctgcaaacaaaaaaaccaccgctaccagcgggtggttgtttgccggatcaagagctaccaactcttttccgaagg  
taactggcttcagcagagcgcagataccaatactgtccttctagtgtagccgtagttaggccaccactcaagaactctgtagcaccgc  
ctacatacctcgtctgctaactctgttaccagtggtgctgccagtggcgataagtcgtgtcttaccgggtggactcaagacgatagtt  
accggataaggcgcagcggctgggctgaacgggggggtcgtgcacacagcccagcttggagcgaacgacctaccgaactgag  
atacctacagcgtgagctatgagaaagcggcacgcttcccgaagggaagaggcggaacaggtatccggtaaagcggcagggtcgg

aacaggagagcgcacgagggagctccaggggaaacgcctggtatcttatagtcctgtcgggttcgccacctgacttgagcgt  
 cgatcttggatgctcgcagggggggcggagccatgaaaaacgcagcaacgcggccttttacggctcctggccttttgctggcct  
 ttgctcacatgttcttctgcggtatccctgattctgtggataaccgtattaccgccatgc

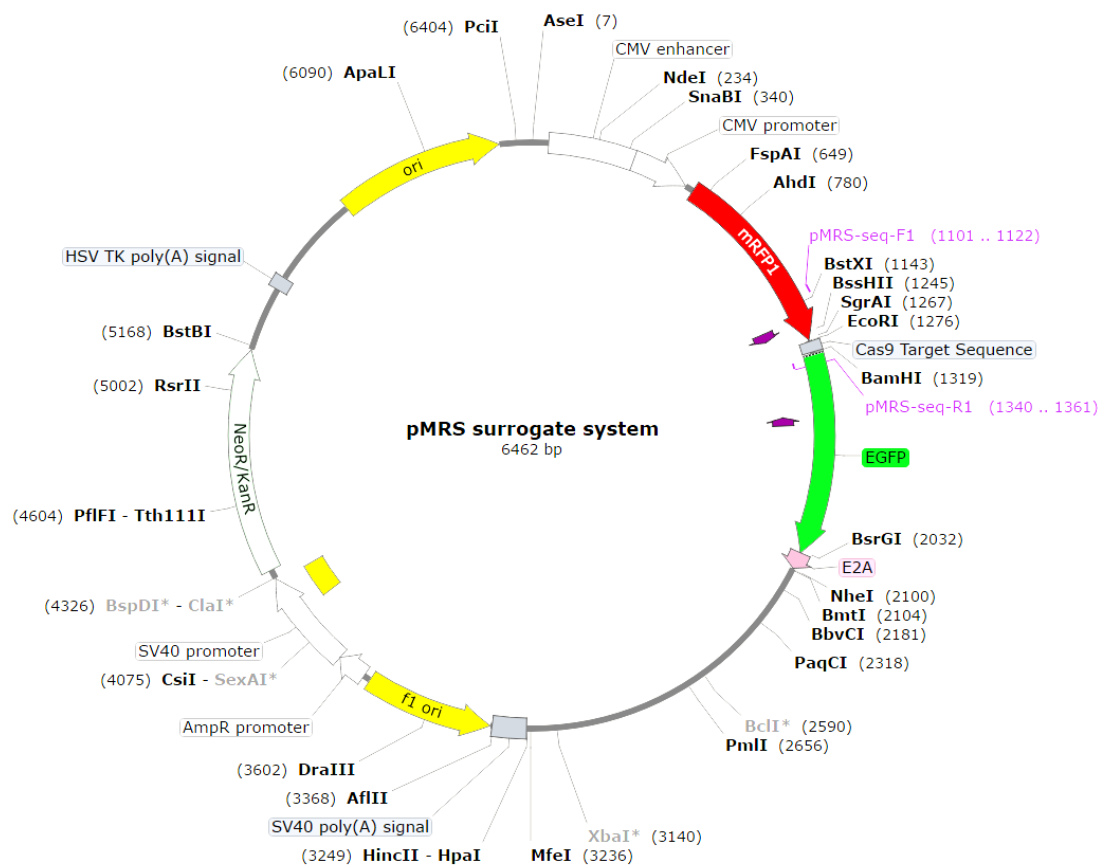

**pRG2S\_Cas9 sequence and map:**

tagtattaatagtaataacggggcattggtcatagccatataatggagttccgcttacataacttacggtaaattggccgcctg  
 gctgaccgccaacgacccccgccattgacgtcaataatgacgtatgtcccatagtaacgccaatagggactttccattgacgtcaat  
 ggggtgagatattacggtaaactgcccacttggcagtacatcaagtgtatcatatgccaagtacgccccattgacgtcaatgacggta  
 aatggcccgctggcattatgccagtacatgaccttatgggacttctacttggcagtacatctacgtattatgcatcgtattaccatg  
 gtgatgcggtttggcagtacatcaatgggcgtggatagcggttgactcaggggattccaagtctccacccattgacgtcaatggg  
 agtttgtttggcaccaaaatcaacgggactttccaaaatgtcgtacaactccgccccattgacgcaaatggcggttagcgtgtacg  
 gtgggaggtctatataagcagagctggttttagtgaaccgtcagatccgtagccaccatggcctctccgaggacgtcatcaaggagt  
 tcatgcgctcaagggtgcgatggagggtccgtgaacggccacgagttcagatcaggggcgaggggcgagggccgccccacg  
 agggcaccagaccgccaagctgaaggtgaccaagggcggccccctgcccctgctgggacatcctgtcccctcagttccagtc  
 ggctccaaggcctacgtgaagcaccgcccgcacatcccgcactacttgaagctgtcctccccgagggttcaagtgggagcgcgtg  
 atgaactcagaggcggcggcgtggtgaccgtgacccaggactcctcctcaggacggcgaattcatctacaaggtgaagctgcg  
 cggcaccactccctccgacggccccgtaatgcagaagaagacatgggctgggaggcctccaccgagcggatgtaccccgag  
 gacggcgcctgaagggcagatcaagatgaggctgaagctgaaggacggcggccactacgacgccgaggtcaagaccacct  
 catggccaagaagcccgtgcagctgccggcgcctacaagaccgacatcaagctggacatcacctcccacaacgaggactacacc  
 atcgtggaacagtagcagcgcgccgagggccgcccactccaccggcgcgaattcGCGTCCGCGCCATGGCCATC  
 TACAAGCAGTCACAGCAGgatccagtgagcaagggcgaggagctgttcaccggggtggtgccatcctggtcag  
 ctggacggcgtgaaacggccacaagttcagcgtgtccggcaggggcgagggcgatgccacctacggcaagctgacctgaag  
 ttcctcaccaccggcaagctgcccgtgccctggcccaccctcgtgaccacctgacctacggcgtgcaagtgttcagccgctacc  
 ccgaccatgaagcagcagacttctcaagtcgccatgccgaaaggctacgtccaggagcgcaccatcttcaaggacgacg  
 gcaactacaagaccgcccggaggtgaagttcagggcgacaccctggtgaaccgacatcagctgaagggtcagctgactcaagga

ggacggcaacatcctggggcacaagctggagtacaactacaacagccacaacgtctatatcatggccgacaagcagaagaacggc  
atcaaggtgaacttcaagatccgccacaacatcaggacggcagcgtgcagctcggcaccactaccagcagaacacccccatcg  
cgacggccccgtgctgctgcccgacaaccactacctgagcaccagctccgccctgagcagaagacccaacgagaagcgcgatca  
catggtcctgctggagttcgtgaccgccgccgggatcactctcggcatggacgagctgtacaagtaaaagcggccgccagtgagca  
gggcgaggagcgtgtaccgggggtgtgccatcctggctgagctggacggcgcgtaaacggccacaagttcagcgtgtccggc  
gagggcgagggcgatgccacctacggcaagctgacctgaagttcactgaccaccggcaagctggccgtgcccggccccacct  
cgtgaccacctgacctacggcgtgcagtgctcagccgctacccgaccacatgaagcagcagcagcttctcaagtcgccatgcc  
cgaaaggctactgccaggagcgcaccatctctcaaggacgacggcaactacaagaccgcgccgaggtgaaagttcaggggcgac  
accctggatgaccgcacgagctgaagggcacgactcaaggaggacggcaacatcctggggcacaagctggagttacaactaca  
cagccacaacgtctatatcatggccgacaagcagaagaacggcacaaggtgaacttcaagatccgccacaacatcaggacggca  
cgctgagctcggcaccactaccagcagaacacccccatcggcgacggccccgtgctgctgcccgacaaccactacctgagcac  
ccagtcgccctgagcaaaagacccaacgagaagcgcgatcactggtcctgctggagttcgtgaccgccgccgggatcactctc  
gcatggacgagctgtacaagcggccgcgactctagatcataatcagccataccacatttgtagggtttactgttataaaaaac  
ctcccacacctccccctgaacctgaacataaaatgaatcaattgtgtgtaactgtttattgcagcttataatggttacaataaa  
aatagcatacaaaatcacaataaaagcatttttactgacttctagtgtgtgtgtcctcaaacatcaatgtatcttaaggcgtaa  
aagcgttaataatgtttaaattcgcgttaaatgtttaaactgctcatttttaaccataaggccgaaatcggcaaatccttataat  
aaaagaatagaccgagatagggtgagttgttccagtttggacaagagctccactattaaagaacgtggactccaacgtcaagg  
cgaaaaaccgtctatcaggggcagtgggccactacgtgaaccatcaccctaataagttttggggcagaggtgccgtaaagcactaa  
tcggaaccctaaagggagccccgatttagagctggcgggaaagccggcgaacgtggcagaaaaggaaaggaaagcaga  
aaggagcggcgctaggcgctggcaagtgtagcggcagcgtgcgtaaccaccacaccggcgcgttaatgccgctaca  
ggcgcgctcaggtggcactttcgggaaatgtgcggaacccctattgttttttaatacattcaaatatgtatccgctcatga  
gacaataacctgataatgctcaataatgaaaaaggaaagctcaggcggaaagaaccagctgtggaatgtgtgtagttag  
ggtgtgaaagtcaccaggctcccagcaggcagaaatgcaagcagcagctcaattagtcagcaaccaggtgtgaaagtc  
caggctcccagcaggcagaagatgcaaaagcagcagctcaattagtcagcaaccatagtcgcccccactccgccatcccgc  
ccctaactccgccagttccgccattctccgcccatggctgactaattttttttttatgtagaggccgagggccgctcggcctctga  
gctattccagaagtagtgaggaggctttttggaggcctaggcttttgaagatcagatcaagagacaggatgaggatcgttcgcatga  
ttgaacaagatgagttgacgcagggttccggccgcttgggtggagaggctatcggctatgactggcacaacagacaatcggctg  
ctctgatccgccgtgtccggctgtcagcggggcggccggctttttgtcaagaccgacctgtccgggtgcccgaatgaactgc  
aagacgaggcagcgcggctatcgtggctggccacgacggcgcttcctgcgagctgtgctgacgttgcactgaaagcggaaagg  
gactggctgtatggggcgaagtgccggggcaggatcctctgtcactcactgtcctgcccagaaaatcattatggctgatgc  
aatgcggcggctgcatacgtttatccggctacgtgccatcagaccacaagcgaacatcgcagcagcagcagcagcagcagcagc  
ggaaagccggctgtgatcaggatgatctggacgaagagcagcaggggctcggccagccgaactgtccagggctcaaggcga  
gcagcccagcggcaggatctgctgtgacccatggcgatgctgtgcccgaatcaggtggaatggccgctttctggattc  
atcagctgtggccggctgggtggcggaccgctatcaggacatagcgtggctaccctgtgatgtgtgaaagcgttgccggaat  
gggctgaccgcttctcgtgtttacggatcggcgtcccgatcgcagcgcagcgccttctatgccttctgacgagttctctgagc  
gggactctgggggtcgaatgaccgaccaagcgcgcccactgcccacagagattcattccaccggcgccttctatgaaagg  
tgggctcggaaatcgtttccgggacgccggctggatgactcaccagcggggatcctatgctgagttctcggccaccctagggg  
gaggtaactgaaacaggaaaggagacaatacggaaaggaaagccgctatgagggcaataaaaagacagaataaaagcaggg  
tgtgggctgtttgtcataaacgcgggggtcggctccagggtgacactctgtcagatcccaccgagacccattggggccaatac  
cccgcgtttctctttcccccaccaccaccacgggtgaaaggcccagggtcgcagccaacgtcggggcggcagggcctg  
ccatagcctcaggttactatatacttttagattgattfaaaacttcttttaattfaaaaggatctaggtaagatccttttgataatc  
gacaaaatcccctaactgagtttctgtccactgagcgtcagaccccgtagaaaagatcaaaagatcttctgagatcctttttctgc  
gcgtaatctgctgcttgaacaaaaaacaccgctaccagcgggtgtttgttggcggatcaagagctaccaactcttttccgaagg  
taactggcttcagcagagcgcagataccaatactgtccttctagttagccgtagttaggccaccctcagaactctgtagcaccgc  
ctacatacctcgtctgtaactcctgttaccagtggtctgctgccaagtgccgataagcgtgtcttaccgggtggactcaagacgatagt  
accggataaggcgcagcggctgggctgaacgggggggtcgtgcacacagcccagcttggagcgaacgacctaccgaactgag  
atactacagcgtgagctatgagaagcggcacgcttcccgaagggaagggcggacaggtatccgtaagcggcagggctgg  
aacaggagagcgcagggagcttccagggggaaagcctgtatctttatagctctgctgggttcgccacctctgacttgagcgt  
cgattttgtgatgctgcaggggggcggagcctatgaaaaagcagcaagcggccttttaccggctcctggcctttgtggcct  
ttgtctacatgttcttctcgtgtatcccctgattctgtggataaccgtattaccgccatgat

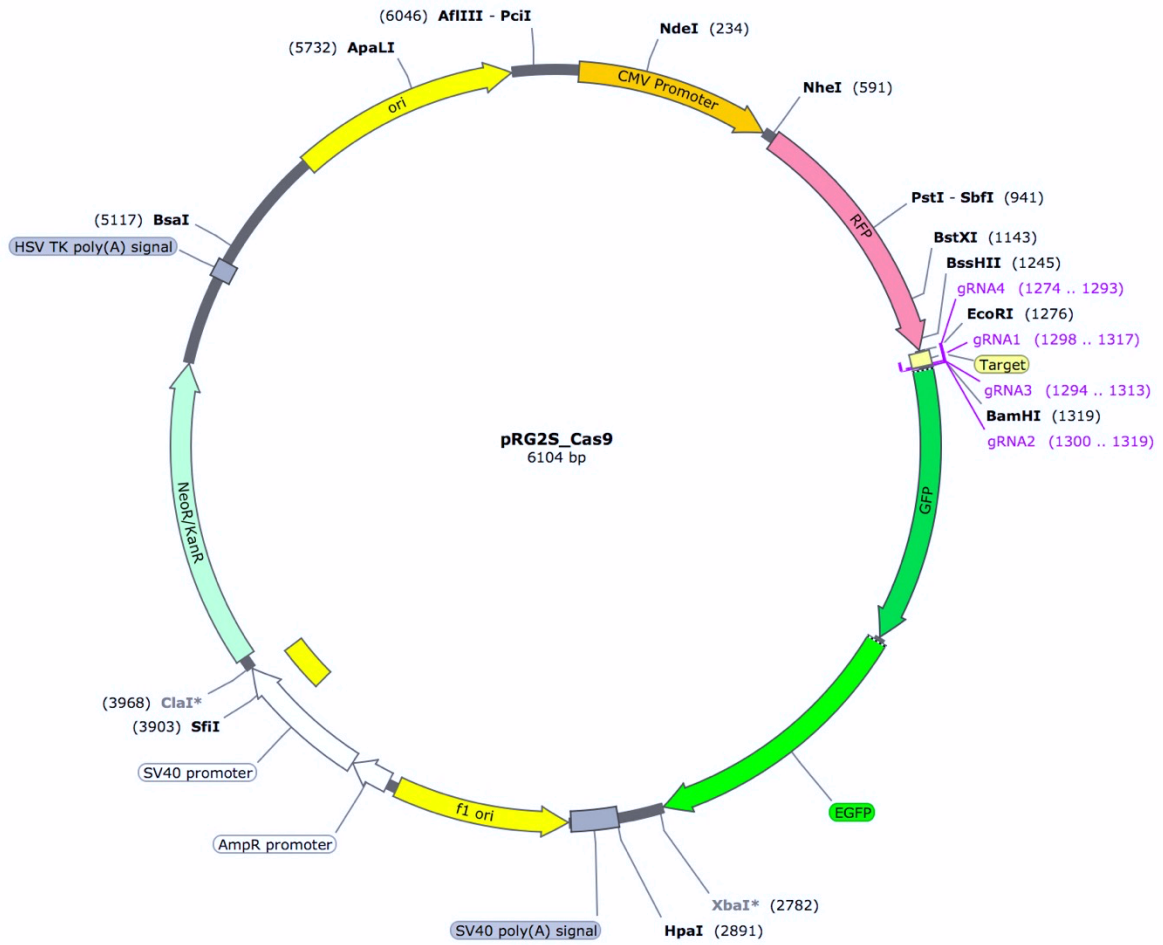

pRG2S\_Cas9 reporter system including Cas9 target sequence, gRNA binding sites and restriction sites
